# Supplementary material
Source: PubMed Central journal article supplement (PMC6913090)

## Supplementary Tables

Table S1. Associations of probiotic taxa with smoking status stratified by race

| Probiotic taxa                          | Race              | Prevalence              |                        |                       | P value <sup>a</sup>      |                          |                                      |
|-----------------------------------------|-------------------|-------------------------|------------------------|-----------------------|---------------------------|--------------------------|--------------------------------------|
|                                         |                   | Current-smokers (N=592) | Former-smokers (N=477) | Never-smokers (N=547) | Current- vs Never-smokers | Former- vs Never-smokers | Current- vs Non-smokers <sup>b</sup> |
| <b>Phylum Actinobacteria</b>            |                   |                         |                        |                       |                           |                          |                                      |
| Genus <i>Bifidobacterium</i>            | African-American  | 85.02%                  | 73.38%                 | 67.19%                | 1.22×10 <sup>-4</sup>     | 0.44                     | 2.83×10 <sup>-4</sup>                |
|                                         | European-American | 87.08%                  | 68.22%                 | 67.47%                | 0.02                      | 0.28                     | 6.85×10 <sup>-4</sup>                |
| Species <i>Bifidobacterium longum</i>   | African-American  | 66.43%                  | 46.77%                 | 42.26%                | 1.58×10 <sup>-6</sup>     | 0.66                     | 1.63×10 <sup>-6</sup>                |
|                                         | European-American | 70.22%                  | 42.99%                 | 33.73%                | 8.18×10 <sup>-6</sup>     | 0.35                     | 2.37×10 <sup>-6</sup>                |
| <b>Phylum Firmicutes</b>                |                   |                         |                        |                       |                           |                          |                                      |
| Genus <i>Lactobacillus</i>              | African-American  | 87.20%                  | 73.76%                 | 75.59%                | 5.70×10 <sup>-3</sup>     | 0.28                     | 1.32×10 <sup>-3</sup>                |
|                                         | European-American | 94.38%                  | 72.90%                 | 68.67%                | 1.07×10 <sup>-4</sup>     | 0.87                     | 3.27×10 <sup>-5</sup>                |
| Species <i>Lactobacillus crispatus</i>  | African-American  | 62.08%                  | 37.26%                 | 34.65%                | 1.78×10 <sup>-7</sup>     | 0.67                     | 2.55×10 <sup>-8</sup>                |
|                                         | European-American | 58.99%                  | 33.18%                 | 33.73%                | 1.36×10 <sup>-3</sup>     | 0.16                     | 1.09×10 <sup>-5</sup>                |
| Species <i>Lactobacillus fermentum</i>  | African-American  | 52.17%                  | 41.44%                 | 38.85%                | 0.02                      | 0.70                     | 0.03                                 |
|                                         | European-American | 70.22%                  | 37.85%                 | 28.31%                | 1.01×10 <sup>-5</sup>     | 0.77                     | 1.11×10 <sup>-7</sup>                |
| Species <i>Lactobacillus gasseri</i>    | African-American  | 69.57%                  | 57.03%                 | 55.64%                | 6.78×10 <sup>-3</sup>     | 0.68                     | 5.04×10 <sup>-3</sup>                |
|                                         | European-American | 79.21%                  | 55.61%                 | 46.99%                | 1.91×10 <sup>-4</sup>     | 0.88                     | 1.30×10 <sup>-5</sup>                |
| Species <i>Lactobacillus oris</i>       | African-American  | 42.27%                  | 29.66%                 | 21.52%                | 7.08×10 <sup>-5</sup>     | 0.02                     | 9.83×10 <sup>-4</sup>                |
|                                         | European-American | 47.19%                  | 23.36%                 | 19.28%                | 1.13×10 <sup>-3</sup>     | 0.81                     | 4.73×10 <sup>-5</sup>                |
| Species <i>Lactobacillus panis</i>      | African-American  | 41.55%                  | 31.56%                 | 28.08%                | 5.84×10 <sup>-4</sup>     | 0.36                     | 5.11×10 <sup>-3</sup>                |
|                                         | European-American | 43.82%                  | 21.03%                 | 19.28%                | 1.31×10 <sup>-3</sup>     | 0.34                     | 8.56×10 <sup>-6</sup>                |
| Species <i>Lactobacillus reuteri</i>    | African-American  | 41.06%                  | 22.81%                 | 21.00%                | 6.89×10 <sup>-6</sup>     | 0.85                     | 5.43×10 <sup>-7</sup>                |
|                                         | European-American | 42.70%                  | 23.83%                 | 20.48%                | 0.02                      | 0.73                     | 4.05×10 <sup>-3</sup>                |
| Species <i>Lactobacillus ultunensis</i> | African-American  | 19.32%                  | 11.03%                 | 7.35%                 | 4.15×10 <sup>-3</sup>     | 0.09                     | 0.01                                 |
|                                         | European-American | 23.6%                   | 8.88%                  | 5.42%                 | 7.55×10 <sup>-3</sup>     | 0.33                     | 4.87×10 <sup>-3</sup>                |

<sup>a</sup> P values were calculated from logistic regression. Sequencing batch as well as other covariates (age, sex, BMI, alcohol consumption, oral health and disease status at the 1<sup>st</sup> follow-up and total energy intake) were adjusted.

<sup>b</sup> Non-smokers included former- and never-smokers.

Table S2. Associations of common taxa with smoking status stratified by race

| Taxa                                     | Race              | Median relative abundance |                        |                       | P value <sup>a</sup>      |                          |                                      |
|------------------------------------------|-------------------|---------------------------|------------------------|-----------------------|---------------------------|--------------------------|--------------------------------------|
|                                          |                   | Current-smokers (N=592)   | Former-smokers (N=477) | Never-smokers (N=547) | Current- vs Never-smokers | Former- vs Never-smokers | Current- vs Non-smokers <sup>b</sup> |
| <b>Phylum Actinobacteria</b>             | African-American  | 10.30%                    | 10.39%                 | 9.70%                 | 1.10×10 <sup>-4</sup>     | 0.74                     | 1.04×10 <sup>-5</sup>                |
|                                          | European-American | 16.00%                    | 9.91%                  | 8.17%                 | 6.36×10 <sup>-9</sup>     | 0.64                     | 1.51×10 <sup>-16</sup>               |
| Family Actinomycetaceae                  | African-American  | 2.88%                     | 2.38%                  | 2.37%                 | 0.03                      | 0.16                     | 3.51×10 <sup>-3</sup>                |
|                                          | European-American | 3.94%                     | 2.74%                  | 2.60%                 | 2.26×10 <sup>-3</sup>     | 0.87                     | 3.42×10 <sup>-6</sup>                |
| Genus Actinomyces                        | African-American  | 2.86%                     | 2.24%                  | 2.29%                 | 0.03                      | 0.15                     | 2.58×10 <sup>-3</sup>                |
|                                          | European-American | 3.93%                     | 2.65%                  | 2.59%                 | 2.02×10 <sup>-3</sup>     | 0.95                     | 2.55×10 <sup>-6</sup>                |
| Species Actinomyces graevenitzii         | African-American  | 0.34%                     | 0.17%                  | 0.17%                 | 6.20×10 <sup>-6</sup>     | 0.58                     | 1.31×10 <sup>-7</sup>                |
|                                          | European-American | 0.38%                     | 0.12%                  | 0.11%                 | 2.38×10 <sup>-4</sup>     | 0.81                     | 4.04×10 <sup>-8</sup>                |
| Species Actinomyces odontolyticus        | African-American  | 1.37%                     | 0.87%                  | 0.94%                 | 1.48×10 <sup>-3</sup>     | 0.60                     | 4.68×10 <sup>-5</sup>                |
|                                          | European-American | 1.80%                     | 1.10%                  | 0.97%                 | 1.13×10 <sup>-3</sup>     | 0.77                     | 3.65×10 <sup>-6</sup>                |
| Genus Rothia                             | African-American  | 5.32%                     | 5.79%                  | 5.38%                 | 8.29×10 <sup>-4</sup>     | 0.45                     | 2.22×10 <sup>-4</sup>                |
|                                          | European-American | 10.08%                    | 4.85%                  | 3.81%                 | 4.89×10 <sup>-6</sup>     | 0.65                     | 3.54×10 <sup>-11</sup>               |
| Species Rothia mucilaginosa              | African-American  | 4.60%                     | 5.01%                  | 4.49%                 | 8.51×10 <sup>-4</sup>     | 0.35                     | 2.12×10 <sup>-4</sup>                |
|                                          | European-American | 8.94%                     | 4.06%                  | 2.88%                 | 4.24×10 <sup>-7</sup>     | 0.23                     | 2.54×10 <sup>-12</sup>               |
| Family Coriobacteriaceae                 | African-American  | 0.14%                     | 0.11%                  | 0.15%                 | 1.18×10 <sup>-3</sup>     | 0.26                     | 7.72×10 <sup>-5</sup>                |
|                                          | European-American | 0.11%                     | 0.07%                  | 0.08%                 | 0.03                      | 0.40                     | 4.51×10 <sup>-5</sup>                |
| Genus Atopobium                          | African-American  | 0.14%                     | 0.11%                  | 0.15%                 | 1.73×10 <sup>-3</sup>     | 0.25                     | 1.18×10 <sup>-4</sup>                |
|                                          | European-American | 0.10%                     | 0.07%                  | 0.07%                 | 0.03                      | 0.38                     | 4.68×10 <sup>-5</sup>                |
| Species Atopobium parvulum               | African-American  | 0.13%                     | 0.10%                  | 0.13%                 | 2.11×10 <sup>-3</sup>     | 0.21                     | 1.52×10 <sup>-4</sup>                |
|                                          | European-American | 0.09%                     | 0.06%                  | 0.06%                 | 0.02                      | 0.42                     | 1.11×10 <sup>-5</sup>                |
| <b>Phylum Proteobacteria</b>             | African-American  | 2.68%                     | 5.92%                  | 7.26%                 | 2.26×10 <sup>-12</sup>    | 0.57                     | 4.67×10 <sup>-11</sup>               |
|                                          | European-American | 1.60%                     | 6.79%                  | 7.06%                 | 1.04×10 <sup>-8</sup>     | 0.77                     | 6.11×10 <sup>-11</sup>               |
| Family Neisseriaceae                     | African-American  | 0.10%                     | 0.58%                  | 0.95%                 | 9.50×10 <sup>-13</sup>    | 0.32                     | 2.54×10 <sup>-10</sup>               |
|                                          | European-American | 0.04%                     | 1.19%                  | 1.35%                 | 8.30×10 <sup>-13</sup>    | 0.24                     | 1.17×10 <sup>-15</sup>               |
| Genus Neisseria                          | African-American  | 0.09%                     | 0.54%                  | 0.88%                 | 1.91×10 <sup>-12</sup>    | 0.38                     | 3.40×10 <sup>-10</sup>               |
|                                          | European-American | 0.03%                     | 1.15%                  | 1.28%                 | 2.51×10 <sup>-12</sup>    | 0.27                     | 3.24×10 <sup>-15</sup>               |
| Species Neisseria pharyngis              | African-American  | 0.01%                     | 0.08%                  | 0.10%                 | 5.96×10 <sup>-9</sup>     | 0.68                     | 2.34×10 <sup>-7</sup>                |
|                                          | European-American | 0.01%                     | 0.09%                  | 0.11%                 | 1.65×10 <sup>-7</sup>     | 0.50                     | 7.59×10 <sup>-7</sup>                |
| Species Neisseria subflava               | African-American  | 0.03%                     | 0.30%                  | 0.54%                 | 8.01×10 <sup>-11</sup>    | 0.33                     | 1.20×10 <sup>-8</sup>                |
|                                          | European-American | 0.01%                     | 0.67%                  | 0.76%                 | 1.23×10 <sup>-11</sup>    | 0.40                     | 2.50×10 <sup>-14</sup>               |
| Family Pasteurellaceae                   | African-American  | 1.86%                     | 3.82%                  | 4.18%                 | 5.82×10 <sup>-9</sup>     | 0.96                     | 8.36×10 <sup>-9</sup>                |
|                                          | European-American | 1.32%                     | 3.86%                  | 4.33%                 | 5.93×10 <sup>-6</sup>     | 0.78                     | 4.58×10 <sup>-7</sup>                |
| Genus Aggregatibacter                    | African-American  | 0.10%                     | 0.13%                  | 0.19%                 | 1.31×10 <sup>-3</sup>     | 0.22                     | 0.02                                 |
|                                          | European-American | 0.01%                     | 0.05%                  | 0.12%                 | 5.17×10 <sup>-3</sup>     | 0.50                     | 3.66×10 <sup>-3</sup>                |
| Genus Haemophilus                        | African-American  | 1.52%                     | 3.51%                  | 3.69%                 | 6.39×10 <sup>-9</sup>     | 0.83                     | 3.78×10 <sup>-9</sup>                |
|                                          | European-American | 1.13%                     | 3.43%                  | 4.10%                 | 7.07×10 <sup>-6</sup>     | 0.70                     | 6.46×10 <sup>-7</sup>                |
| Species Haemophilus parahaemolyticus     | African-American  | 0.16%                     | 0.47%                  | 0.48%                 | 5.21×10 <sup>-10</sup>    | 0.43                     | 2.35×10 <sup>-10</sup>               |
|                                          | European-American | 0.16%                     | 0.54%                  | 0.43%                 | 2.93×10 <sup>-5</sup>     | 0.61                     | 3.48×10 <sup>-6</sup>                |
| Species Haemophilus paraphrohaemolyticus | African-American  | 1.27%                     | 2.83%                  | 2.96%                 | 6.59×10 <sup>-8</sup>     | 0.95                     | 9.05×10 <sup>-8</sup>                |
|                                          | European-American | 0.99%                     | 2.68%                  | 3.14%                 | 2.94×10 <sup>-5</sup>     | 0.58                     | 4.26×10 <sup>-6</sup>                |

|                                                 |                   |        |        |        |                        |      |                        |
|-------------------------------------------------|-------------------|--------|--------|--------|------------------------|------|------------------------|
| <b>Phylum Bacteroidetes</b>                     |                   |        |        |        |                        |      |                        |
| Species <i>Prevotella sp. oral taxon 313</i>    | African-American  | 4.74%  | 3.64%  | 3.98%  | $8.31 \times 10^{-3}$  | 0.73 | $2.86 \times 10^{-3}$  |
|                                                 | European-American | 3.41%  | 2.05%  | 1.73%  | $6.90 \times 10^{-3}$  | 0.29 | $1.64 \times 10^{-4}$  |
| Family <i>Flavobacteriaceae</i>                 | African-American  | 0.05%  | 0.10%  | 0.10%  | $1.03 \times 10^{-3}$  | 0.94 | $2.42 \times 10^{-3}$  |
|                                                 | European-American | 0.03%  | 0.09%  | 0.07%  | 0.03                   | 0.02 | 0.01                   |
| <b>Phylum Firmicutes</b>                        |                   |        |        |        |                        |      |                        |
| Genus <i>Gemella</i>                            | African-American  | 1.46%  | 1.85%  | 2.29%  | $7.02 \times 10^{-7}$  | 0.04 | $1.26 \times 10^{-4}$  |
|                                                 | European-American | 0.95%  | 1.99%  | 2.47%  | $8.41 \times 10^{-9}$  | 0.31 | $8.99 \times 10^{-10}$ |
| Species <i>Streptococcus oligofermentans</i>    | African-American  | 0.13%  | 0.35%  | 0.31%  | $9.93 \times 10^{-13}$ | 0.67 | $7.49 \times 10^{-15}$ |
|                                                 | European-American | 0.13%  | 0.61%  | 0.79%  | $6.23 \times 10^{-8}$  | 0.56 | $5.42 \times 10^{-9}$  |
| Species <i>Streptococcus sp. oral taxon 057</i> | African-American  | 9.61%  | 8.72%  | 8.16%  | $7.79 \times 10^{-4}$  | 0.36 | $5.33 \times 10^{-3}$  |
|                                                 | European-American | 12.47% | 9.52%  | 7.79%  | $7.73 \times 10^{-9}$  | 0.18 | $1.90 \times 10^{-9}$  |
| Species <i>Streptococcus sp. oral taxon 070</i> | African-American  | 24.82% | 21.80% | 21.43% | 0.31                   | 0.73 | 0.47                   |
|                                                 | European-American | 20.27% | 25.33% | 30.50% | $4.31 \times 10^{-5}$  | 0.23 | $6.70 \times 10^{-7}$  |
| Genus <i>Megasphaera</i>                        | African-American  | 0.26%  | 0.12%  | 0.14%  | $1.09 \times 10^{-5}$  | 0.37 | $4.86 \times 10^{-7}$  |
|                                                 | European-American | 0.25%  | 0.10%  | 0.09%  | $4.52 \times 10^{-3}$  | 0.79 | $1.63 \times 10^{-6}$  |
| Species <i>Megasphaera micronuciformis</i>      | African-American  | 0.24%  | 0.11%  | 0.13%  | $4.20 \times 10^{-5}$  | 0.38 | $2.23 \times 10^{-6}$  |
|                                                 | European-American | 0.25%  | 0.09%  | 0.09%  | $6.58 \times 10^{-3}$  | 0.91 | $5.84 \times 10^{-6}$  |

<sup>a</sup> *P* values were calculated from logistic regression. Sequencing batch as well as other covariates (age, sex, BMI, alcohol consumption, oral health and disease status at the 1<sup>st</sup> follow-up and total energy intake) were adjusted.

<sup>b</sup> Non-smokers included former- and never-smokers.

**Table S3. Associations of rare bacterial taxa with smoking status stratified by race**

| Taxa                                        | Race              | Prevalence              |                        |                       | P value <sup>a</sup>      |                          |                                      |
|---------------------------------------------|-------------------|-------------------------|------------------------|-----------------------|---------------------------|--------------------------|--------------------------------------|
|                                             |                   | Current-smokers (N=592) | Former-smokers (N=477) | Never-smokers (N=547) | Current- vs Never-smokers | Former- vs Never-smokers | Current- vs Non-smokers <sup>b</sup> |
| <b>Phylum Actinobacteria</b>                |                   |                         |                        |                       |                           |                          |                                      |
| Family <i>Bifidobacteriaceae</i>            | African-American  | 95.17%                  | 88.59%                 | 84.25%                | 6.15×10 <sup>-4</sup>     | 0.37                     | 3.95×10 <sup>-3</sup>                |
|                                             | European-American | 96.07%                  | 91.59%                 | 85.54%                | 0.03                      | 0.15                     | 0.02                                 |
| Species <i>Actinomyces lingnae</i> _[NVP]   | African-American  | 92.75%                  | 88.59%                 | 87.40%                | 3.20×10 <sup>-5</sup>     | 0.59                     | 1.32×10 <sup>-5</sup>                |
|                                             | European-American | 91.57%                  | 87.38%                 | 84.94%                | 0.06                      | 0.34                     | 0.01                                 |
| <b>Phylum Proteobacteria</b>                |                   |                         |                        |                       |                           |                          |                                      |
| Family <i>Burkholderiaceae</i>              | African-American  | 45.41%                  | 61.60%                 | 66.67%                | 9.58×10 <sup>-10</sup>    | 0.11                     | 2.95×10 <sup>-9</sup>                |
|                                             | European-American | 36.52%                  | 65.42%                 | 77.11%                | 1.76×10 <sup>-7</sup>     | 0.63                     | 6.61×10 <sup>-9</sup>                |
| Genus <i>Lautropia</i>                      | African-American  | 43.72%                  | 61.22%                 | 66.14%                | 3.11×10 <sup>-11</sup>    | 0.12                     | 5.25×10 <sup>-11</sup>               |
|                                             | European-American | 36.52%                  | 64.49%                 | 77.11%                | 1.76×10 <sup>-7</sup>     | 0.53                     | 1.12×10 <sup>-8</sup>                |
| Genus <i>Kingella</i>                       | African-American  | 70.29%                  | 77.95%                 | 82.94%                | 1.62×10 <sup>-3</sup>     | 0.16                     | 2.51×10 <sup>-3</sup>                |
|                                             | European-American | 60.11%                  | 82.24%                 | 90.36%                | 5.52×10 <sup>-6</sup>     | 0.53                     | 4.05×10 <sup>-7</sup>                |
| Species <i>Kingella denitrificans</i>       | African-American  | 27.29%                  | 41.44%                 | 44.36%                | 7.09×10 <sup>-5</sup>     | 0.53                     | 1.19×10 <sup>-4</sup>                |
|                                             | European-American | 19.10%                  | 50.00%                 | 51.81%                | 3.24×10 <sup>-5</sup>     | 0.68                     | 3.86×10 <sup>-7</sup>                |
| Species <i>Kingella elongata</i>            | African-American  | 65.22%                  | 74.14%                 | 78.22%                | 1.95×10 <sup>-3</sup>     | 0.26                     | 2.31×10 <sup>-3</sup>                |
|                                             | European-American | 54.49%                  | 80.37%                 | 86.14%                | 1.79×10 <sup>-5</sup>     | 0.67                     | 2.38×10 <sup>-8</sup>                |
| Species <i>Neisseria oralis</i>             | African-American  | 21.98%                  | 38.02%                 | 50.92%                | 1.69×10 <sup>-12</sup>    | 0.00                     | 1.94×10 <sup>-11</sup>               |
|                                             | European-American | 15.17%                  | 49.53%                 | 58.43%                | 4.96×10 <sup>-9</sup>     | 0.60                     | 7.20×10 <sup>-11</sup>               |
| Genus <i>Cardiobacterium</i>                | African-American  | 35.99%                  | 52.85%                 | 54.59%                | 1.38×10 <sup>-6</sup>     | 0.89                     | 1.73×10 <sup>-5</sup>                |
|                                             | European-American | 30.90%                  | 61.68%                 | 70.48%                | 8.44×10 <sup>-6</sup>     | 0.48                     | 1.20×10 <sup>-7</sup>                |
| <b>Phylum Bacteroidetes</b>                 |                   |                         |                        |                       |                           |                          |                                      |
| Species <i>Prevotella nanceiensis</i>       | African-American  | 85.99%                  | 86.69%                 | 87.14%                | 0.26                      | 0.95                     | 0.39                                 |
|                                             | European-American | 68.54%                  | 85.51%                 | 94.58%                | 5.88×10 <sup>-6</sup>     | 0.07                     | 5.99×10 <sup>-6</sup>                |
| Species <i>Capnocytophaga sputigena</i>     | African-American  | 42.75%                  | 59.32%                 | 60.89%                | 2.55×10 <sup>-6</sup>     | 0.94                     | 5.15×10 <sup>-6</sup>                |
|                                             | European-American | 43.82%                  | 62.62%                 | 66.27%                | 6.77×10 <sup>-3</sup>     | 0.74                     | 2.48×10 <sup>-3</sup>                |
| <b>Phylum Firmicutes</b>                    |                   |                         |                        |                       |                           |                          |                                      |
| Family <i>Lactobacillaceae</i>              | African-American  | 88.65%                  | 77.19%                 | 78.22%                | 0.01                      | 0.41                     | 3.69×10 <sup>-3</sup>                |
|                                             | European-American | 94.38%                  | 76.17%                 | 74.70%                | 1.68×10 <sup>-3</sup>     | 0.78                     | 5.29×10 <sup>-4</sup>                |
| Genus <i>Enterococcus</i>                   | African-American  | 65.46%                  | 66.54%                 | 72.44%                | 3.15×10 <sup>-3</sup>     | 0.10                     | 0.02                                 |
|                                             | European-American | 57.87%                  | 77.10%                 | 79.52%                | 5.71×10 <sup>-4</sup>     | 0.43                     | 1.92×10 <sup>-4</sup>                |
| Genus <i>Lachnospiraceae</i> _[G-2]         | African-American  | 57.25%                  | 54.75%                 | 60.63%                | 3.67×10 <sup>-3</sup>     | 0.01                     | 0.01                                 |
|                                             | European-American | 38.76%                  | 50.47%                 | 63.86%                | 0.03                      | 0.58                     | 0.05                                 |
| Species <i>Lachnoanaerobaculum umeaense</i> | African-American  | 76.09%                  | 82.13%                 | 81.63%                | 0.02                      | 0.92                     | 9.38×10 <sup>-3</sup>                |
|                                             | European-American | 65.73%                  | 81.31%                 | 85.54%                | 0.02                      | 0.49                     | 6.84×10 <sup>-3</sup>                |
| Species <i>Eubacterium infirmum</i>         | African-American  | 66.18%                  | 71.10%                 | 75.59%                | 0.06                      | 0.07                     | 0.12                                 |
|                                             | European-American | 52.81%                  | 72.43%                 | 82.53%                | 5.43×10 <sup>-5</sup>     | 0.45                     | 1.54×10 <sup>-4</sup>                |
| <b>Phylum Spirochaetes</b>                  |                   |                         |                        |                       |                           |                          |                                      |
| Species <i>Treponema denticola</i>          | African-American  | 77.78%                  | 56.27%                 | 56.96%                | 4.00×10 <sup>-4</sup>     | 0.60                     | 3.01×10 <sup>-5</sup>                |
|                                             | European-American | 51.69%                  | 40.19%                 | 48.19%                | 0.54                      | 0.37                     | 0.19                                 |

<sup>a</sup> P values were calculated from logistic regression. Sequencing batch as well as other covariates (age, sex, BMI, alcohol consumption, oral health and disease status at the 1st follow-up and total energy intake) were adjusted.

<sup>b</sup> Non-smokers included former- and never-smokers.

**Table S4. Associations of probiotic taxa with smoking status stratified by sequencing batch**

| Probiotic taxa                         | Race         | Prevalence                 |                           |                          | P value <sup>a</sup>      |                          |                                      |
|----------------------------------------|--------------|----------------------------|---------------------------|--------------------------|---------------------------|--------------------------|--------------------------------------|
|                                        |              | Current-smokers<br>(N=592) | Former-smokers<br>(N=477) | Never-smokers<br>(N=547) | Current- vs Never-smokers | Former- vs Never-smokers | Current- vs Non-smokers <sup>b</sup> |
| <b>Phylum Actinobacteria</b>           |              |                            |                           |                          |                           |                          |                                      |
| Genus <i>Bifidobacterium</i>           | Frist batch  | 84.24%                     | 75.09%                    | 70.18%                   | 0.02                      | 0.60                     | 4.70×10 <sup>-3</sup>                |
|                                        | Second batch | 88.71%                     | 66.04%                    | 64.12%                   | 1.77×10 <sup>-5</sup>     | 0.64                     | 6.64×10 <sup>-6</sup>                |
| Species <i>Bifidobacterium longum</i>  | Frist batch  | 69.95%                     | 50.57%                    | 43.16%                   | 1.90×10 <sup>-5</sup>     | 0.66                     | 2.62×10 <sup>-6</sup>                |
|                                        | Second batch | 62.37%                     | 38.21%                    | 35.88%                   | 7.77×10 <sup>-7</sup>     | 0.39                     | 6.73×10 <sup>-7</sup>                |
| <b>Phylum Firmicutes</b>               |              |                            |                           |                          |                           |                          |                                      |
| Genus <i>Lactobacillus</i>             | Frist batch  | 90.89%                     | 77.36%                    | 76.49%                   | 4.70×10 <sup>-3</sup>     | 0.34                     | 2.27×10 <sup>-4</sup>                |
|                                        | Second batch | 86.02%                     | 68.40%                    | 70.23%                   | 7.06×10 <sup>-4</sup>     | 0.91                     | 5.48×10 <sup>-4</sup>                |
| Species <i>Lactobacillus crispatus</i> | Frist batch  | 60.59%                     | 37.36%                    | 37.19%                   | 1.84×10 <sup>-5</sup>     | 0.24                     | 8.21×10 <sup>-7</sup>                |
|                                        | Second batch | 62.37%                     | 33.02%                    | 31.30%                   | 1.28×10 <sup>-6</sup>     | 0.74                     | 7.33×10 <sup>-8</sup>                |
| Species <i>Lactobacillus fermentum</i> | Frist batch  | 61.33%                     | 42.64%                    | 34.04%                   | 4.45×10 <sup>-6</sup>     | 0.31                     | 7.56×10 <sup>-6</sup>                |
|                                        | Second batch | 49.46%                     | 36.32%                    | 37.40%                   | 0.10                      | 0.59                     | 0.03                                 |
| Species <i>Lactobacillus gasseri</i>   | Frist batch  | 73.65%                     | 63.02%                    | 56.14%                   | 0.04                      | 0.78                     | 5.28×10 <sup>-3</sup>                |
|                                        | Second batch | 69.89%                     | 48.11%                    | 49.62%                   | 1.98×10 <sup>-4</sup>     | 0.96                     | 1.07×10 <sup>-4</sup>                |
| Species <i>Lactobacillus oris</i>      | Frist batch  | 44.58%                     | 29.06%                    | 20.35%                   | 2.19×10 <sup>-6</sup>     | 0.08                     | 2.30×10 <sup>-5</sup>                |
|                                        | Second batch | 41.94%                     | 24.06%                    | 21.37%                   | 6.55×10 <sup>-3</sup>     | 0.40                     | 3.49×10 <sup>-3</sup>                |
| Species <i>Lactobacillus panis</i>     | Frist batch  | 36.45%                     | 24.53%                    | 19.65%                   | 3.49×10 <sup>-3</sup>     | 0.98                     | 3.19×10 <sup>-3</sup>                |
|                                        | Second batch | 54.84%                     | 29.72%                    | 31.68%                   | 1.21×10 <sup>-4</sup>     | 0.90                     | 6.00×10 <sup>-5</sup>                |
| Species <i>Lactobacillus reuteri</i>   | Frist batch  | 43.10%                     | 27.55%                    | 21.75%                   | 4.38×10 <sup>-5</sup>     | 0.97                     | 2.74×10 <sup>-5</sup>                |
|                                        | Second batch | 38.17%                     | 17.92%                    | 19.85%                   | 8.25×10 <sup>-4</sup>     | 0.68                     | 3.28×10 <sup>-5</sup>                |

<sup>a</sup> P values were calculated from logistic regression. Covariates including age, sex, race, BMI, alcohol consumption, oral health and disease status at the 1<sup>st</sup> follow-up and total energy intake were adjusted.

<sup>b</sup> Non-smokers included former- and never-smokers.

**Table S5. Associations of common taxa with smoking status stratified by sequencing batch**

| Taxa                                     | Race         | Median relative abundance  |                           |                          | P value <sup>a</sup>      |                          |                                      |
|------------------------------------------|--------------|----------------------------|---------------------------|--------------------------|---------------------------|--------------------------|--------------------------------------|
|                                          |              | Current-smokers<br>(N=592) | Former-smokers<br>(N=477) | Never-smokers<br>(N=547) | Current- vs Never-smokers | Former- vs Never-smokers | Current- vs Non-smokers <sup>b</sup> |
| <b>Phylum Actinobacteria</b>             | First batch  | 11.90%                     | 7.89%                     | 6.55%                    | 6.52×10 <sup>-13</sup>    | 0.43                     | 2.52×10 <sup>-17</sup>               |
|                                          | Second batch | 13.03%                     | 12.13%                    | 11.40%                   | 0.06                      | 0.88                     | 0.02                                 |
| Family Actinomycetaceae                  | First batch  | 3.36%                      | 2.67%                     | 2.56%                    | 8.03×10 <sup>-4</sup>     | 0.53                     | 3.53×10 <sup>-6</sup>                |
|                                          | Second batch | 2.49%                      | 2.29%                     | 2.36%                    | 0.06                      | 0.57                     | 0.05                                 |
| Genus Actinomyces                        | First batch  | 3.34%                      | 2.60%                     | 2.56%                    | 6.65×10 <sup>-4</sup>     | 0.47                     | 2.01×10 <sup>-6</sup>                |
|                                          | Second batch | 2.48%                      | 2.23%                     | 2.25%                    | 0.05                      | 0.56                     | 0.04                                 |
| Species Actinomyces graevenitzi          | First batch  | 0.30%                      | 0.11%                     | 0.11%                    | 1.27×10 <sup>-8</sup>     | 0.39                     | 8.28×10 <sup>-15</sup>               |
|                                          | Second batch | 0.45%                      | 0.22%                     | 0.28%                    | 7.97×10 <sup>-3</sup>     | 0.97                     | 5.57×10 <sup>-3</sup>                |
| Species Actinomyces odontolyticus        | First batch  | 1.81%                      | 1.12%                     | 1.11%                    | 3.13×10 <sup>-4</sup>     | 0.72                     | 2.30×10 <sup>-7</sup>                |
|                                          | Second batch | 1.04%                      | 0.82%                     | 0.78%                    | 1.43×10 <sup>-3</sup>     | 0.52                     | 4.62×10 <sup>-3</sup>                |
| Genus Rothia                             | First batch  | 6.24%                      | 3.54%                     | 2.68%                    | 1.50×10 <sup>-11</sup>    | 0.19                     | 2.56×10 <sup>-14</sup>               |
|                                          | Second batch | 7.61%                      | 7.53%                     | 7.28%                    | 0.39                      | 0.85                     | 0.17                                 |
| Species Rothia mucilaginosa              | First batch  | 5.42%                      | 3.01%                     | 2.16%                    | 6.82×10 <sup>-12</sup>    | 0.26                     | 1.93×10 <sup>-15</sup>               |
|                                          | Second batch | 6.36%                      | 6.38%                     | 6.14%                    | 0.23                      | 0.49                     | 0.15                                 |
| Family Coriobacteriaceae                 | First batch  | 0.08%                      | 0.05%                     | 0.05%                    | 0.01                      | 0.04                     | 1.27×10 <sup>-5</sup>                |
|                                          | Second batch | 0.36%                      | 0.20%                     | 0.22%                    | 8.91×10 <sup>-4</sup>     | 0.89                     | 6.50×10 <sup>-4</sup>                |
| Genus Atopobium                          | First batch  | 0.08%                      | 0.05%                     | 0.05%                    | 0.02                      | 0.03                     | 2.21×10 <sup>-5</sup>                |
|                                          | Second batch | 0.36%                      | 0.20%                     | 0.22%                    | 8.97×10 <sup>-4</sup>     | 0.88                     | 6.46×10 <sup>-4</sup>                |
| Species Atopobium parvulum               | First batch  | 0.07%                      | 0.04%                     | 0.04%                    | 0.02                      | 0.04                     | 2.09×10 <sup>-5</sup>                |
|                                          | Second batch | 0.26%                      | 0.17%                     | 0.18%                    | 8.16×10 <sup>-4</sup>     | 0.85                     | 4.43×10 <sup>-4</sup>                |
| <b>Phylum Proteobacteria</b>             | First batch  | 1.81%                      | 4.36%                     | 5.07%                    | 2.12×10 <sup>-10</sup>    | 0.41                     | 4.94×10 <sup>-9</sup>                |
|                                          | Second batch | 3.51%                      | 9.00%                     | 9.19%                    | 6.80×10 <sup>-13</sup>    | 0.76                     | 1.04×10 <sup>-14</sup>               |
| Family Neisseriaceae                     | First batch  | 0.04%                      | 0.47%                     | 0.72%                    | 1.62×10 <sup>-10</sup>    | 0.72                     | 4.09×10 <sup>-10</sup>               |
|                                          | Second batch | 0.13%                      | 1.56%                     | 1.82%                    | 3.30×10 <sup>-16</sup>    | 0.97                     | 3.78×10 <sup>-16</sup>               |
| Genus Neisseria                          | First batch  | 0.04%                      | 0.44%                     | 0.67%                    | 2.80×10 <sup>-10</sup>    | 0.78                     | 5.22×10 <sup>-10</sup>               |
|                                          | Second batch | 0.11%                      | 1.50%                     | 1.59%                    | 1.05×10 <sup>-15</sup>    | 0.95                     | 1.01×10 <sup>-15</sup>               |
| Species Neisseria pharyngis              | First batch  | 0.01%                      | 0.03%                     | 0.06%                    | 1.22×10 <sup>-5</sup>     | 0.32                     | 2.71×10 <sup>-4</sup>                |
|                                          | Second batch | 0.03%                      | 0.29%                     | 0.27%                    | 9.03×10 <sup>-12</sup>    | 0.45                     | 3.96×10 <sup>-11</sup>               |
| Species Neisseria subflava               | First batch  | 0.02%                      | 0.24%                     | 0.41%                    | 7.15×10 <sup>-10</sup>    | 0.80                     | 2.20×10 <sup>-9</sup>                |
|                                          | Second batch | 0.04%                      | 0.77%                     | 1.02%                    | 1.40×10 <sup>-13</sup>    | 0.67                     | 1.16×10 <sup>-13</sup>               |
| Family Pasteurellaceae                   | First batch  | 1.48%                      | 2.97%                     | 3.59%                    | 4.40×10 <sup>-8</sup>     | 0.39                     | 7.81×10 <sup>-7</sup>                |
|                                          | Second batch | 2.21%                      | 5.38%                     | 5.52%                    | 8.34×10 <sup>-8</sup>     | 0.61                     | 7.51×10 <sup>-10</sup>               |
| Genus Aggregatibacter                    | First batch  | 0.05%                      | 0.06%                     | 0.15%                    | 1.79×10 <sup>-4</sup>     | 0.15                     | 4.07×10 <sup>-3</sup>                |
|                                          | Second batch | 0.10%                      | 0.20%                     | 0.18%                    | 0.06                      | 0.89                     | 0.05                                 |
| Genus Haemophilus                        | First batch  | 1.14%                      | 2.54%                     | 3.08%                    | 7.68×10 <sup>-8</sup>     | 0.48                     | 8.00×10 <sup>-7</sup>                |
|                                          | Second batch | 1.78%                      | 4.65%                     | 4.58%                    | 5.96×10 <sup>-8</sup>     | 0.58                     | 4.45×10 <sup>-10</sup>               |
| Species Haemophilus parahaemolyticus     | First batch  | 0.14%                      | 0.37%                     | 0.41%                    | 1.27×10 <sup>-7</sup>     | 0.93                     | 6.92×10 <sup>-7</sup>                |
|                                          | Second batch | 0.19%                      | 0.62%                     | 0.60%                    | 1.61×10 <sup>-9</sup>     | 0.18                     | 4.90×10 <sup>-11</sup>               |
| Species Haemophilus paraphrohaemolyticus | First batch  | 0.99%                      | 2.07%                     | 2.61%                    | 4.50×10 <sup>-7</sup>     | 0.36                     | 7.67×10 <sup>-6</sup>                |
|                                          | Second batch | 1.47%                      | 3.72%                     | 3.59%                    | 9.53×10 <sup>-7</sup>     | 0.74                     | 1.20×10 <sup>-8</sup>                |

|                                                 |              |        |        |        |                        |      |                        |  |
|-------------------------------------------------|--------------|--------|--------|--------|------------------------|------|------------------------|--|
| <b>Phylum Bacteroidetes</b>                     |              |        |        |        |                        |      |                        |  |
| Species <i>Prevotella sp. oral taxon 313</i>    | First batch  | 3.35%  | 1.74%  | 1.75%  | $4.00 \times 10^{-3}$  | 0.98 | $1.87 \times 10^{-4}$  |  |
|                                                 | Second batch | 5.92%  | 4.37%  | 4.38%  | 0.02                   | 0.19 | 0.02                   |  |
| Family <i>Flavobacteriaceae</i>                 | First batch  | 0.03%  | 0.04%  | 0.04%  | 0.02                   | 0.21 | 0.01                   |  |
|                                                 | Second batch | 0.14%  | 0.23%  | 0.20%  | $1.44 \times 10^{-3}$  | 0.58 | $1.42 \times 10^{-3}$  |  |
| <b>Phylum Firmicutes</b>                        |              |        |        |        |                        |      |                        |  |
| Genus <i>Gemella</i>                            | First batch  | 1.16%  | 1.70%  | 2.14%  | $5.42 \times 10^{-7}$  | 0.19 | $2.61 \times 10^{-5}$  |  |
|                                                 | Second batch | 1.42%  | 2.29%  | 2.48%  | $4.79 \times 10^{-9}$  | 0.07 | $8.01 \times 10^{-8}$  |  |
| Species <i>Streptococcus oligofermentans</i>    | First batch  | 0.12%  | 0.55%  | 0.62%  | $1.90 \times 10^{-14}$ | 0.73 | $3.83 \times 10^{-16}$ |  |
|                                                 | Second batch | 0.15%  | 0.36%  | 0.29%  | $1.21 \times 10^{-6}$  | 0.49 | $1.98 \times 10^{-6}$  |  |
| Species <i>Streptococcus sp. oral taxon 057</i> | First batch  | 11.15% | 10.16% | 8.51%  | $1.34 \times 10^{-6}$  | 0.11 | $7.28 \times 10^{-5}$  |  |
|                                                 | Second batch | 9.02%  | 8.00%  | 7.56%  | $3.56 \times 10^{-6}$  | 0.55 | $1.25 \times 10^{-6}$  |  |
| Species <i>Streptococcus sp. oral taxon 070</i> | First batch  | 26.64% | 29.70% | 32.86% | $5.03 \times 10^{-4}$  | 0.37 | $9.16 \times 10^{-4}$  |  |
|                                                 | Second batch | 16.75% | 18.87% | 18.05% | 0.22                   | 0.60 | 0.13                   |  |
| Genus <i>Megasphaera</i>                        | First batch  | 0.26%  | 0.08%  | 0.10%  | $1.16 \times 10^{-4}$  | 0.21 | $1.01 \times 10^{-7}$  |  |
|                                                 | Second batch | 0.25%  | 0.13%  | 0.15%  | $6.28 \times 10^{-5}$  | 0.71 | $5.75 \times 10^{-5}$  |  |
| Species <i>Megasphaera micronuciformis</i>      | First batch  | 0.25%  | 0.08%  | 0.09%  | $2.71 \times 10^{-4}$  | 0.18 | $3.71 \times 10^{-7}$  |  |
|                                                 | Second batch | 0.21%  | 0.12%  | 0.14%  | $2.82 \times 10^{-4}$  | 0.72 | $3.06 \times 10^{-4}$  |  |

<sup>a</sup> *P* values were calculated from logistic regression. Covariates including age, sex, race, BMI, alcohol consumption, oral health and disease status at the 1<sup>st</sup> follow-up and total energy intake were adjusted.

<sup>b</sup> Non-smokers included former- and never-smokers.

**Table S6. Associations of rare bacterial taxa with smoking status sequencing batch**

| Taxa                                        | Race         | Prevalence              |                        |                       | P value <sup>a</sup>      |                          |                                      |
|---------------------------------------------|--------------|-------------------------|------------------------|-----------------------|---------------------------|--------------------------|--------------------------------------|
|                                             |              | Current-smokers (N=592) | Former-smokers (N=477) | Never-smokers (N=547) | Current- vs Never-smokers | Former- vs Never-smokers | Current- vs Non-smokers <sup>b</sup> |
| <b>Phylum Actinobacteria</b>                |              |                         |                        |                       |                           |                          |                                      |
| Family <i>Bifidobacteriaceae</i>            | First batch  | 95.07%                  | 90.94%                 | 83.51%                | 4.43×10 <sup>-3</sup>     | 0.12                     | 5.68×10 <sup>-3</sup>                |
|                                             | Second batch | 96.24%                  | 88.68%                 | 85.88%                | 0.01                      | 0.72                     | 0.02                                 |
| Species <i>Actinomyces lingnae</i> _[NVP]   | First batch  | 90.39%                  | 83.02%                 | 80.35%                | 2.85×10 <sup>-4</sup>     | 0.83                     | 3.09×10 <sup>-5</sup>                |
|                                             | Second batch | 96.77%                  | 94.34%                 | 93.51%                | 9.55×10 <sup>-3</sup>     | 0.28                     | 0.02                                 |
| <b>Phylum Proteobacteria</b>                |              |                         |                        |                       |                           |                          |                                      |
| Family <i>Burkholderiaceae</i>              | First batch  | 41.38%                  | 64.15%                 | 72.28%                | 7.48×10 <sup>-13</sup>    | 0.08                     | 4.52×10 <sup>-12</sup>               |
|                                             | Second batch | 45.70%                  | 62.26%                 | 67.18%                | 7.77×10 <sup>-6</sup>     | 0.40                     | 7.30×10 <sup>-7</sup>                |
| Genus <i>Lautropia</i>                      | First batch  | 40.64%                  | 63.40%                 | 72.28%                | 1.38×10 <sup>-13</sup>    | 0.06                     | 1.08×10 <sup>-12</sup>               |
|                                             | Second batch | 43.55%                  | 61.79%                 | 66.41%                | 1.39×10 <sup>-6</sup>     | 0.42                     | 7.13×10 <sup>-8</sup>                |
| Genus <i>Kingella</i>                       | First batch  | 64.53%                  | 78.11%                 | 84.21%                | 3.12×10 <sup>-5</sup>     | 0.23                     | 4.79×10 <sup>-6</sup>                |
|                                             | Second batch | 73.12%                  | 82.08%                 | 86.26%                | 1.06×10 <sup>-3</sup>     | 0.31                     | 1.56×10 <sup>-3</sup>                |
| Species <i>Kingella denitrificans</i>       | First batch  | 23.65%                  | 39.62%                 | 42.11%                | 2.29×10 <sup>-4</sup>     | 0.48                     | 3.20×10 <sup>-5</sup>                |
|                                             | Second batch | 27.42%                  | 52.36%                 | 51.53%                | 4.36×10 <sup>-7</sup>     | 0.96                     | 5.76×10 <sup>-8</sup>                |
| Species <i>Kingella elongata</i>            | First batch  | 59.61%                  | 76.60%                 | 82.11%                | 6.88×10 <sup>-6</sup>     | 0.26                     | 1.27×10 <sup>-7</sup>                |
|                                             | Second batch | 67.20%                  | 77.36%                 | 79.01%                | 0.01                      | 0.92                     | 7.89×10 <sup>-3</sup>                |
| Species <i>Neisseria oralis</i>             | First batch  | 20.69%                  | 45.28%                 | 57.19%                | 1.17×10 <sup>-13</sup>    | 5.63×10 <sup>-3</sup>    | 7.76×10 <sup>-14</sup>               |
|                                             | Second batch | 18.28%                  | 40.57%                 | 48.85%                | 7.21×10 <sup>-9</sup>     | 0.08                     | 4.59×10 <sup>-9</sup>                |
| Genus <i>Cardiobacterium</i>                | First batch  | 30.54%                  | 51.32%                 | 56.14%                | 3.69×10 <sup>-6</sup>     | 0.22                     | 1.06×10 <sup>-6</sup>                |
|                                             | Second batch | 43.01%                  | 63.68%                 | 62.98%                | 7.23×10 <sup>-6</sup>     | 0.82                     | 2.32×10 <sup>-6</sup>                |
| <b>Phylum Bacteroidetes</b>                 |              |                         |                        |                       |                           |                          |                                      |
| Species <i>Prevotella nanceiensis</i>       | First batch  | 82.27%                  | 85.66%                 | 92.63%                | 7.59×10 <sup>-5</sup>     | 0.08                     | 3.74×10 <sup>-3</sup>                |
|                                             | Second batch | 77.42%                  | 86.79%                 | 85.88%                | 0.08                      | 0.78                     | 4.75×10 <sup>-3</sup>                |
| Species <i>Capnocytophaga sputigena</i>     | First batch  | 42.36%                  | 55.85%                 | 60.35%                | 4.29×10 <sup>-4</sup>     | 0.38                     | 4.58×10 <sup>-4</sup>                |
|                                             | Second batch | 44.62%                  | 66.98%                 | 64.89%                | 1.19×10 <sup>-5</sup>     | 0.44                     | 2.04×10 <sup>-6</sup>                |
| <b>Phylum Firmicutes</b>                    |              |                         |                        |                       |                           |                          |                                      |
| Family <i>Lactobacillaceae</i>              | First batch  | 91.63%                  | 80.00%                 | 80.35%                | 0.04                      | 0.22                     | 2.93×10 <sup>-3</sup>                |
|                                             | Second batch | 87.63%                  | 72.64%                 | 73.66%                | 1.70×10 <sup>-3</sup>     | 0.97                     | 1.31×10 <sup>-3</sup>                |
| Genus <i>Enterococcus</i>                   | First batch  | 65.27%                  | 74.34%                 | 80.35%                | 2.98×10 <sup>-5</sup>     | 0.16                     | 2.47×10 <sup>-4</sup>                |
|                                             | Second batch | 58.60%                  | 67.45%                 | 68.32%                | 0.03                      | 0.79                     | 0.01                                 |
| Genus <i>Lachnospiraceae</i> _[G-2]         | First batch  | 51.72%                  | 55.47%                 | 67.72%                | 7.53×10 <sup>-4</sup>     | 5.44×10 <sup>-3</sup>    | 8.13×10 <sup>-3</sup>                |
|                                             | Second batch | 51.61%                  | 49.53%                 | 54.96%                | 0.16                      | 0.40                     | 0.11                                 |
| Species <i>Lachnoanaerobaculum umeaense</i> | First batch  | 72.66%                  | 78.49%                 | 84.21%                | 3.71×10 <sup>-3</sup>     | 0.32                     | 7.71×10 <sup>-3</sup>                |
|                                             | Second batch | 73.66%                  | 85.85%                 | 81.30%                | 0.09                      | 0.14                     | 2.97×10 <sup>-3</sup>                |
| Species <i>Eubacterium infirmum</i>         | First batch  | 58.37%                  | 67.55%                 | 75.44%                | 3.69×10 <sup>-5</sup>     | 0.02                     | 2.85×10 <sup>-4</sup>                |
|                                             | Second batch | 70.43%                  | 76.89%                 | 80.15%                | 0.13                      | 0.64                     | 0.11                                 |
| <b>Phylum Spirochaetes</b>                  |              |                         |                        |                       |                           |                          |                                      |
| Species <i>Treponema denticola</i>          | First batch  | 67.24%                  | 47.17%                 | 52.63%                | 0.01                      | 0.18                     | 3.22×10 <sup>-3</sup>                |
|                                             | Second batch | 75.81%                  | 51.42%                 | 56.11%                | 8.03×10 <sup>-3</sup>     | 0.74                     | 1.59×10 <sup>-3</sup>                |

<sup>a</sup> P values were calculated from logistic regression. Covariates including age, sex, race, BMI, alcohol consumption, oral health and disease status at the 1st follow-up and total energy intake were adjusted.

<sup>b</sup> Non-smokers included former- and never-smokers.



### Supplementary Figures

**Figure S1. Difference in relative abundance of common taxa between current-smokers and never-smokers.** This figure shows the difference of relative abundance of all common taxa (with a relative abundance among never-smokers of >0.10%) between current- and never-smokers. The red color represents that the taxon was more abundant among current-smokers and the blue color represent that the taxon was more abundant among never-smokers. The grey color represents that the taxon didn't showed a differential abundance. The pentagram represents that the difference of relative abundance reached a Bonferroni-corrected threshold.

A:Actinomycetaceae  
 B:Actinomyces  
 C:Actinomyces graevenitzii  
 D:Actinomyces odontolyticus  
 E:Rothia  
 F:Rothia mucilaginosa  
 G:Coriobacteriaceae  
 H:Atopobium  
 I:Atopobium parvulum  
 J:Prevotella sp. oral taxon 313  
 K:Flavobacteriaceae  
 L:Gemella  
 M:Streptococcus oligofermentans  
 N:Streptococcus sp. oral taxon 057  
 O:Streptococcus sp. oral taxon 070  
 P:Megasphaera  
 Q:Megasphaera micronuciformis  
 R:Neisseriaceae  
 S:Neisseria  
 T:Neisseria pharyngis  
 U:Neisseria subflava  
 V:Pasteurellaceae  
 W:Aggregatibacter  
 X:Haemophilus  
 Y:Haemophilus parahaemolyticus  
 Z:Haemophilus paraphaemolyticus

## Common taxa's relative abundance &amp; smoking status

● Enriched in current-smokers  
 ● Enriched in never-smokers  
 ● Not enriched  
 ★ Significantly enriched in current-smokers  
 ★ Significantly enriched in never-smokers

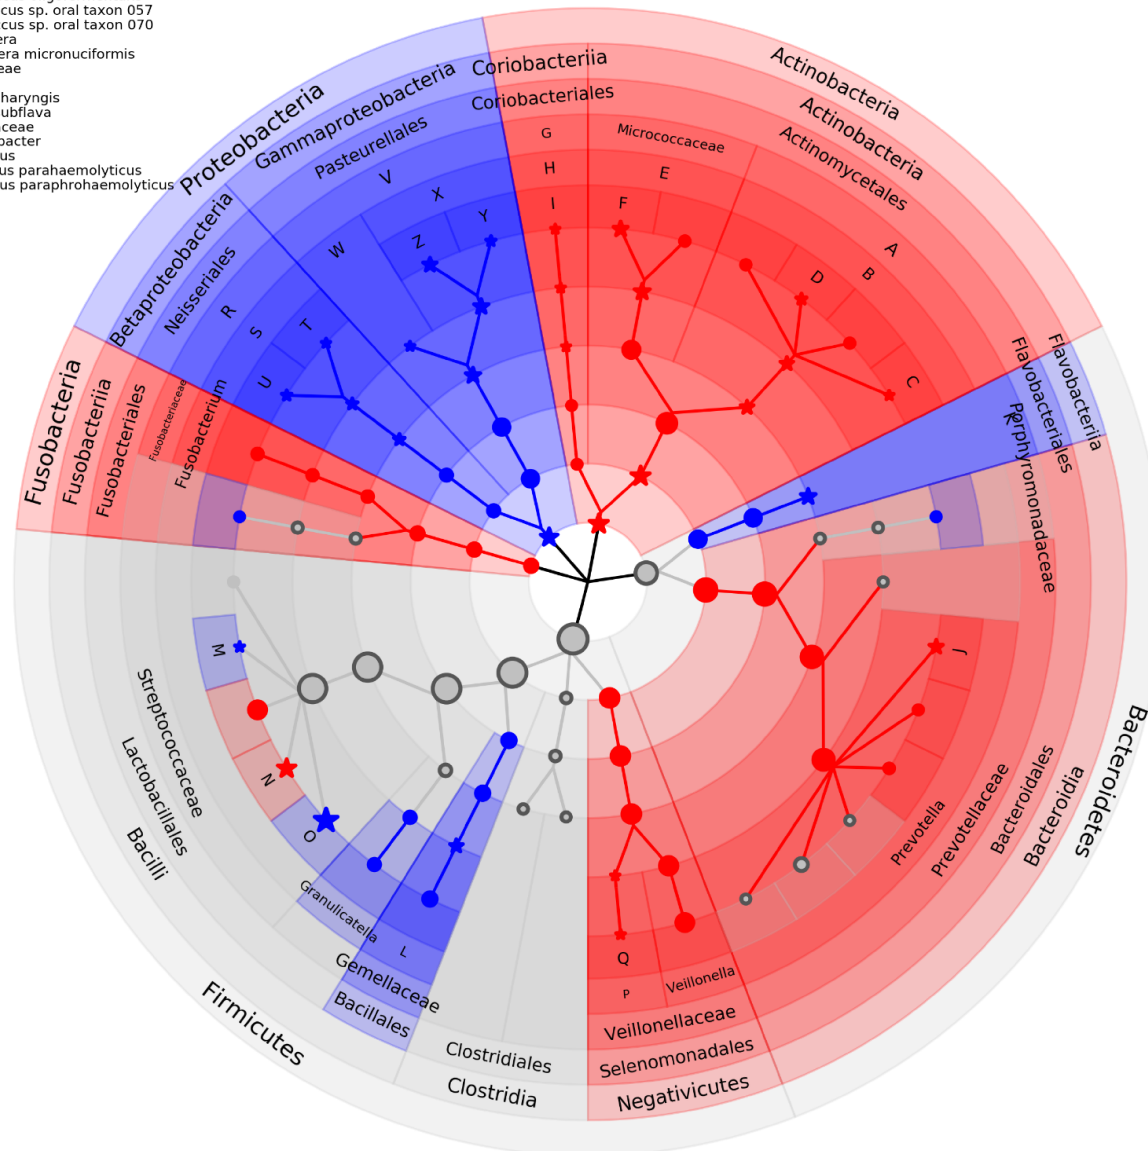

**Figure S2. Difference in prevalence of probiotic taxa and rare taxa between current-smokers and never-smokers.** This figure shows the difference of relative abundance of probiotic taxa and rare taxa (with a relative abundance among never-smokers of  $\leq 0.10\%$  and a prevalence among never-smokers of  $>30\%$ ) between current- and never-smokers. The red color represents that the taxon was more prevalent among current-smokers and the blue color represent that the taxon was more prevalent among never-smokers. The grey color represents that the taxon didn't showed a differential prevalence. The pentagram represents that the difference of prevalence reached a Bonferroni-corrected threshold.

- A: Actinomyces lingnae\_[NVP]
- B: Bifidobacteriaceae
- C: Bifidobacterium
- D: Bifidobacterium longum
- E: Prevotella nanceiensis
- F: Capnocytophaga sputigena
- G: Enterococcus
- H: Lactobacillaceae
- I: Lactobacillus
- J: Lactobacillus crispatus
- K: Lactobacillus fermentum
- L: Lactobacillus gasseri
- M: Lactobacillus oris
- N: Lactobacillus panis
- O: Lactobacillus reuteri
- P: Lachnoanaerobaculum umeaense
- Q: Lachnospiraceae\_[G-2]
- R: Eubacterium infirmum
- S: Cardiobacterium
- T: Burkholderiaceae
- U: Lautropia
- V: Kingella
- W: Kingella denitrificans
- X: Kingella elongata
- Y: Neisseria oralis
- Z: Treponema denticola

Rare taxa's prevalence & smoking status

- Enriched in current-smokers
- Enriched in never-smokers
- Not enriched
- ★ Significantly enriched in current-smokers
- ★ Significantly enriched in never-smokers

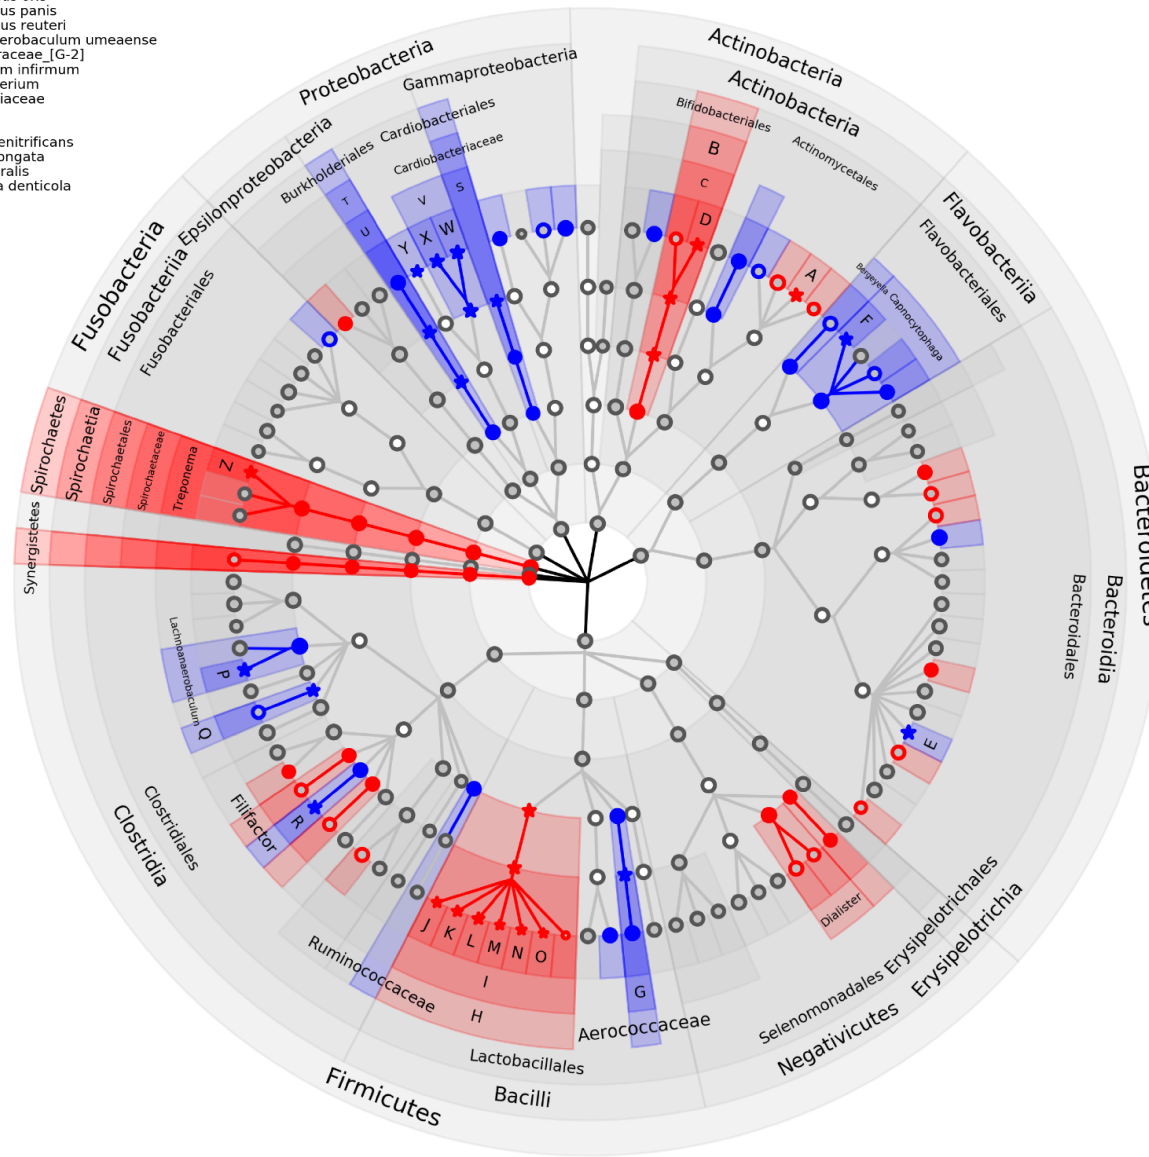

Supplement: NIHMS1060375-supplement-supple.pdf [file NIHMS1060375-supplement-supple.pdf]
